# Supplementary material for: Fire hazard mitigation in bi-continuous phase polymer composites: surface vs. bulk and experimental vs. computational
Source: Royal Society of Chemistry journal article supplement (doi:10.1039/d5ta02009c), 2025-01-01
Supplement: d5ta02009c1.pdf [file d5ta02009c1.pdf]

## Supplementary materials

### **Fire Hazard Mitigation in Bi-Continuous Phase Polymer Composites: Surface vs. Bulk and Experimental vs. Computational**

*Han Zhang<sup>1,3</sup>, Tingting Chen<sup>4</sup>, Ruiqi Zhang<sup>1,3</sup>, Shenyu Zhang<sup>1,3</sup>, Jun Zhang<sup>1,3\*</sup>, Zhen Zhang<sup>2\*</sup>,  
Nouredine Abidi<sup>2</sup>.*

<sup>1</sup> Department of Polymer Science and Engineering, College of Materials Science and Engineering, Nanjing Tech University, Nanjing 211816, China.

<sup>2</sup> Fiber and Biopolymer Research Institute, Texas Tech University, Lubbock, TX, USA.

<sup>3</sup> Jiangsu Collaborative Innovation Center for Advanced Inorganic Function Composites, Nanjing 211816, China.

<sup>4</sup> College of Safety Science and Engineering, Nanjing Tech University, Nanjing 211816, China.

Corresponding authors: Jun Zhang and Zhen Zhang

E-mail address: J. Z.: zhangjun@njtech.edu.cn; Z.Z.: zha03518@ttu.edu.

## 1 Coupling simulation of indoor dynamic fire and personnel evacuation

AutoCAD 2019 is used to construct a 3D building model of  $25 \times 25 \times 3$  m, and to divide the mesh model into  $0.1 \times 0.1 \times 0.1$  m for modular calculation<sup>1</sup>. Subsequently, it was imported into the Fire Dynamic Simulation (FDS) software PYROSIM 2019 to further simulate indoor smoke, heat, visibility, and other results in fire scenarios, and generate a visual model. Then, by coupling the FDS results (carbon monoxide volume fraction, carbon dioxide volume fraction, oxygen volume fraction, smoke, temperature) with personnel evacuation simulation results, the influence of different materials on the speed of personnel evacuation in indoor fire scenarios is obtained<sup>2</sup>. During the coupling simulation process, the evacuation route of indoor personnel is controlled by the Steering method<sup>3</sup>. The stoichiometric equations for the decomposition products of PVC, HDPE, and CPE are controlled by the following equation (1-3):

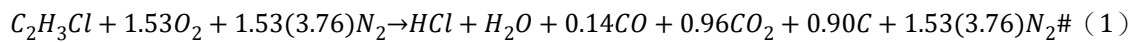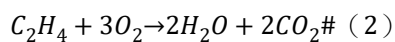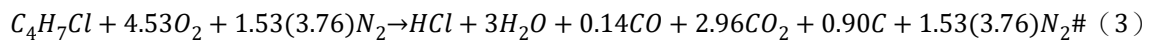

For ease of modeling, PVC, HDPE, and CPE were considered as  $C_2H_3Cl$ ,  $C_2H_4$ , and  $C_4H_7Cl$ , respectively, and defined as traceable raw materials.  $O_2$ ,  $N_2$ ,  $HCl$ ,  $H_2O$ ,  $CO$ ,  $CO_2$ , and Soot C were defined as untraceable raw materials.

**Table S1** Information of different pyrolysis models

|         | Model                                                                   | P/H            | N-CPE          | H-CPE          | CI-CPE         |
|---------|-------------------------------------------------------------------------|----------------|----------------|----------------|----------------|
| Phase 1 | Density ( $\text{g}\cdot\text{cm}^{-3}$ )                               | 0.91           | 1.45           | 1.51           | 1.45           |
|         | Heat of combustion ( $\text{MJ}\cdot\text{kg}^{-1}$ )                   | 60.00          | 15.76          | 20.05          | 17.19          |
|         | Thermal conductivity ( $\text{W}\cdot\text{m}^{-1}\cdot\text{K}^{-1}$ ) | 0.41           | 9.34           | 3.78           | 7.81           |
|         | Smoke yield ( $\text{m}^2\cdot\text{s}^{-1}$ )                          | 0.05           | 0.07           | 0.10           | 0.07           |
| Phase 2 | Density ( $\text{g}\cdot\text{cm}^{-3}$ )                               | 1.40           | 1.40           | 1.40           | 1.32           |
|         | Heat of combustion ( $\text{MJ}\cdot\text{kg}^{-1}$ )                   | 5.00           | 5.00           | 3.00           | 5.00           |
|         | Thermal conductivity ( $\text{W}\cdot\text{m}^{-1}\cdot\text{K}^{-1}$ ) | 0.17           | 0.17           | 0.17           | 0.17           |
|         | Smoke yield ( $\text{m}^2\cdot\text{s}^{-1}$ )                          | 0.21           | 0.21           | 0.21           | 0.18           |
|         | Absorption Coefficient ( $\text{m}^{-1}$ )                              | $5\times 10^4$ | $5\times 10^4$ | $5\times 10^4$ | $5\times 10^4$ |
|         | External heat flux (kW)                                                 | 35             | 35             | 35             | 35             |
|         | Burner area ( $\text{m}^2$ )                                            | 9              | 9              | 9              | 9              |
|         | Initial indoor temperature ( $^{\circ}\text{C}$ )                       | 20             | 20             | 20             | 20             |
|         | Number of occupants                                                     | 10             | 10             | 10             | 10             |

Note: the above data (phase 1 and phase 2) are sourced from experiments.

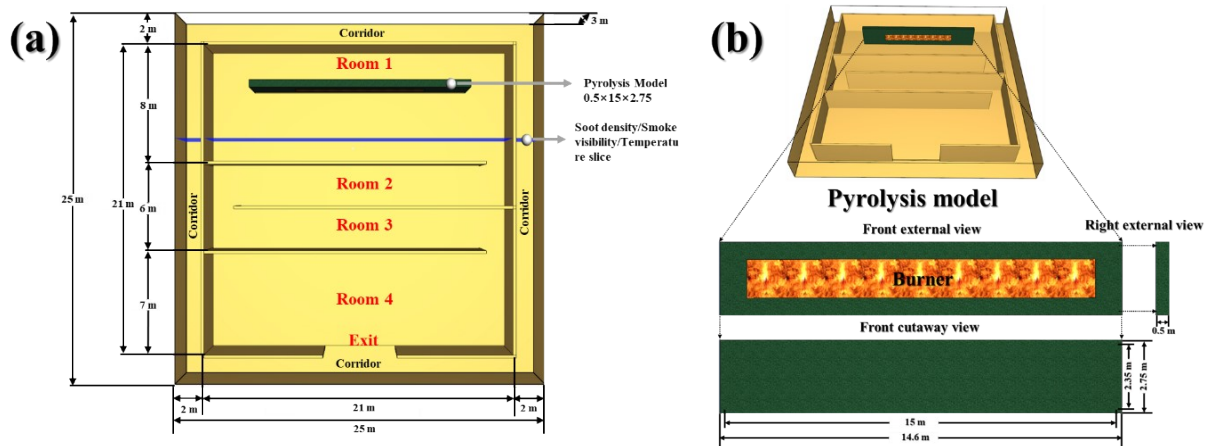**Figure S1** 3D models of dynamic fire simulation: (a) building model and (b) pyrolysis model.

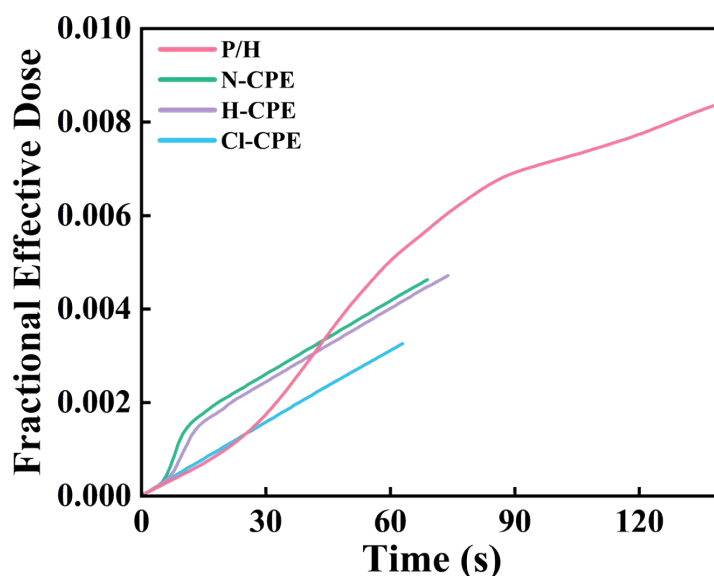

**Figure S2** Real-time Fractional Effective Dose during coupling simulation.

## 2 Detailed data information in section 3.9

**Table S2** Comparison of detailed parameters in different composite systems

| Sample | T <sub>d,5</sub><br>(°C) | TSP<br>(m <sup>-2</sup> ) | SD<br>(%) | Visibility of<br>200 s in<br>simulation<br>(m) | LOI<br>(%) | Heat<br>release<br>(kW·m <sup>-2</sup> ) | FDS coupled<br>personnel<br>evacuation (s) |
|--------|--------------------------|---------------------------|-----------|------------------------------------------------|------------|------------------------------------------|--------------------------------------------|
| N-CPE  | 283.7                    | 13.3                      | 51.18     | 17.8                                           | 37.5       | 450                                      | 69                                         |
| H-CPE  | 291.7                    | 13.7                      | 62.81     | 8.7                                            | 39.7       | 565                                      | 74                                         |
| Cl-CPE | 286.7                    | 12.6                      | 50.35     | 30                                             | 33.9       | 334                                      | 63                                         |

**Table S3** Comparison of the bulky chlorine, surface chlorine and surface EG content of different systems

| Sample | Surface chlorine content <sup>a</sup> | Bulky chlorine content (wt%) | Surface EG content <sup>a</sup> |
|--------|---------------------------------------|------------------------------|---------------------------------|
| N-CPE  | 3 <sup>rd</sup>                       | 20.5                         | 1 <sup>st</sup>                 |
| H-CPE  | 1 <sup>st</sup>                       | 24.2                         | 3 <sup>rd</sup>                 |
| Cl-CPE | 2 <sup>nd</sup>                       | 17.0                         | 2 <sup>nd</sup>                 |

a-EG content and surface chlorine content were analyzed using Raman and FTIR spectroscopy, respectively. However, due to limitations in quantitative analysis, only the order was provided.

## References

1. Y. Xin, J. P. Gore, K. B. McGrattan, R. G. Rehm and H. R. Baum, *Combust Flame*, 2005, **141**, 329-335.
2. B. Ralph and R. Carvel, *Fire Safety J*, 2018, **100**, 157-170.

3. A. Borrmann, A. Kneidl, G. Köster, S. Ruzika and M. Thiemann, *Safety Sci*, 2012, **50**, 1695-1703.
